# Supplementary material
Source: publisher site journal article supplement (https://www.dovepress.com/article/471477)
Supplement: Supplementary file 1 [file get_supplementary_file.php]

Full interview guide:

Patients:

**Domain 1: Living with chronic pain: challenges, needs, and treatment**

**Theme 1: Clinic population and challenges/needs of living with chronic pain**

What aspects of your life have been impacted by your pain?

What aspects of your personal background impact your pain?
(if need clarification – can add more specific direction “Does any aspect of your environment, social and cultural background, behavior and/or medical situation impact your pain? How so?)

Probes:

ENVIRONMENTAL

Probe: socioeconomical factors (e.g., employment, housing, finances, pain stigma, caregiver role, navigating multiple demands)

Probe: geographical– challenges of traveling to clinic

Probe: health care (challenging engaging with health care system, accessibility, bias, discrimination)

SOCIOCULTURAL:

Is there anything about your family or cultural background that impacts how you experience pain and related treatment?

Probe: Cultural factors (how culture, upbringing, political views and practice of religion impact pain)

Probe: Social factors (social support, isolation, relationship strain, how people in your life know you are in pain and how they respond to your pain)

Probe: Psychological factors (depression, anxiety, stress, substances)

BEHAVIORAL:

Probe: Changes in what you do / do not do (e.g., probe for reducing activity/ limiting behaviors / avoidance)

Probe: Lifestyle behaviors (substance use, alcohol, smoking, cannabis use)

Probe: work participation

MEDICAL:

Probe: Managing biomedical aspects of pain and comorbidities

Probe: Adherence to medical care; seeking pain care

**Theme 2: Pain treatment**

What treatments have you tried to help manage your pain?

Probe: medications

Probe: Xrays, MRIs

Probe: PT

Probe: chronic pain clinic

Probe: chiropractic clinic

Probe: psychiatry/psychosocial care/seeing a therapist

Probe: exercise/walking?

Probe: injections

Probe: acupuncture

Probe: Marijuana, CBD

What do you think of the pain treatments you have tried?

What are some things that are helping?

What are some things that are not helping?

When you start a new treatment, what are your hopes for how it will go?
What do you consider a successful treatment?

Probe:

- Pain level
- Function

When your provider recommends a new treatment, how often do you try it out? How often do you stick with it?

Probe: Why / why not? What can improve the pain care you are currently receiving?

- Are there any services you would like to receive that you are not receiving?

**Domain 2: Program implementation and preferences**

**Theme 1: Overview of core program components**

We developed a program to support adults with chronic pain. The program teaches skills like deep breathing to relax, practicing being kind toward ourselves, and learning to think about pain in a more helpful way. The program also helps people gradually increase how much they walk. This program has been shown to help people manage their pain better. Past participants have also felt more engaged with their lives. The program is delivered in a group format. It has 10 sessions. Each session is 60 minutes once a week.

What are your first impressions of a program like this?

(Probe “why” for impressions)

What do you feel would be important or helpful to address in this program? What would you want to learn?

What do you think about the number of sessions (10)?

Probe: Burden of the time commitment

**Theme 2: Feedback on core skills**

The program teaches 4 core groups of skills:

1. **Walking and weekly gradual increase in walking regardless of pain.**

Many older adults with chronic pain struggle to stay active. Walking is safe and helps improve pain, mood, and overall health. In this program, we ask our patients to gradually increase how much they walk every week no matter their level of pain. We make these recommendations in partnership with your primary doctor. For example, if someone walks for about 10 minutes a day, we will ask them to walk 10 minutes no matter if they have a little or a lot of pain. We tell them to link walking with activities that they enjoy or have to do (walk instead of drive to store, walk grandkids to the park). If any concerns arise, we work with your primary care doctor.

What do you think about the focus of the program on walking? Probe: Motivation to increase walking and make that a main focus of treatment

To what degree are there safe places to walk where you live in the winter?

How might we be able to help people such as yourself walk more?

Probe: involve a caregiver, kids.

What might get in the way of increasing your walking?

People with chronic pain often do too much when they have less pain, and too little when they have a lot of pain. In this program, we teach people to increase walking regardless of whether or not they have pain. This way, the pain is no longer in control of their lives. What do you think about this idea?

1. **Mind-Body skills**

We teach participants about the mind-body connection – how your thoughts and feelings impact your pain.

In this program we think about chronic pain as a condition in which the nerves fire out of control. Your brain controls your nerves. To help pain, we try to calm the brain so that nerves calm down too. What do you think about this?

Skills like deep breathing can help you relax and calm your brain. They can make pain background noise, so you can engage in activities you like. Over time, with practice, the skills we teach in this program can change our brains such that nerves tend to stop firing out of control and people experience less pain. What do you think about this? How helpful do you think this could be in managing your pain?

What may increase your being more open to practice such skills?

1. **Pain-specific cognitive-behavioral skills**

We help patients learn to spot the ways negative thoughts can make pain worse. We help people reduce fear about pain. For example, we teach people to look at pain like a headache – unpleasant but not dangerous. In this way, we teach people how to gain control over their pain rather than feel controlled by their pain.

What do you think about these skills? Would you be agree to engage in these activities? Would you be motivated to do so?

**Theme 2: Feedback on format and delivery modality**

How do you feel about participating in a group format, alongside other older adults with chronic pain like yourselves?

How do you feel about coming in person? What might get in the way?

**Theme 3: Feedback on NPs delivery**

The [clinic name] has group programs that are delivered by nurse practitioners. What are your thoughts on the program described earlier being delivered by Nurse Practitioners at the clinic?

PROBE: Level of comfort

**Theme 4: Multicultural and language issues**

Many patients at the [clinic name] do not speak English as their first language. If you are one of those individuals - what are your thoughts on having the program sessions run in English?

Do you have any language-related concerns?

Probe: Health literacy

What are your thoughts on having separate groups run in English and other languages such as Spanish?

What are your thoughts on having an interpreter present during the program sessions?

If an interpreter is present, what would be the best way to translate?

E.g., Interpreter types on tablet to patient in real time. Patient types back as needed and interpreter contributes.

How important would it be for you to have all materials (e.g., manual,) translated?

Are there any considerations related to your cultural, religious, ethnic, or racial background that would be important for us to take into account in this program or how we deliver it?

Probe: Language issues, social norms, involvement of family, use of religious-based/spiritual coping

**Domain 4: Barriers and facilitators for program participation**

What might prevent you from participating in a program like this?

Probe: Time, travel, remembering, COVID-19 concerns, language

What would help you to be able to attend?

Probe: Facilitators (e.g., payment, parking, reminders, interpreters)

**Homework completion**

In order to gain the most out of the program it helps to regularly practice the skills that are taught. One way to sustain practice is to keep track of what you do. In this program we will ask you to practice the skills we teach for about 10 minutes daily, as well as log your practice and any physical activity you performed.

- How do you feel about being asked to complete home practice of the skills learned?
- What may get in the way of doing home practice approximately 10 minutes a day for the duration of the 4-week program?
  - Time, busy with other appointments
  - Motivation, fatigue
  - Forgetting
  - Prioritizing skills
  - Overwhelmed by where to start
  - Distracted by pain
  - Beliefs it won’t help
  - Unsure of how to correctly practice skills
- Is there anything you can think of that would facilitate such home practice?
  - Reminders
  - Linking practice to an established routine (e.g. right after wake-up, meals, taking medication)
  - Downloading skills on a phone as an app
  - Alarms on phone
  - Rewarding myself
  - Understanding purpose of logging
  - Being able to contact study clinician for clarification on skills (i.e., email, call, log onto next session 5 minutes early)
- What would be your preferred method for completing home practice logs?
  - Writing on physical paper
  - Completing on my laptop/desktop on a Word document
  - Completing on my laptop/desktop on a website
  - Completing on my phone on an app
  - Completing on my phone on a website

**WRAP-UP**

Is there anything else that we did not ask that you would like to share?

Thank you for your participation in this focus group today! The information you shared with us is very helpful, and will aid the program in meeting the needs of all patients.

Staff:

**Domain 1: Provider experience/perceptions of this population and their needs**

**Theme 1: Clinic population**

Can you tell us about the chronic pain patients older than 55 that you see at [clinic name]?

What are the unique needs of older adults with chronic pain at [clinic name] as compared to say the MGH campus patient population?

ENVIRONMENTAL:

Probe: socioeconomical factors (SES, education, health literacy, employment, housing, finances, pain stigma, access to resources, safety, caregiver role, multiple demands)

Probe: geographical– distance from clinic

Probe: health care (challenging engaging with health care system, accessibility, bias, discrimination)

How are these factors impacting pain if at all?

How are these factors impacting pain care?

SOCIOCULTURAL:

Probe: Cultural factors (how culture, upbringing, political views and practice of religion impact pain)

Probe: Social factors (social support, social cohesion)

Probe: Psychological factors (depression, anxiety, trauma, substance use)

How are these factors impacting the pain if at all?

How are these factors impacting pain care?

BEHAVIORAL:

Probe: Coping and Resiliency factors (e.g., gratitude, optimism, mindfulness, pain related beliefs including search for cure)

Probe: Lifestyle behaviors (substance use, alcohol, smoking, cannabis use; exercise including walking)

How are these factors impacting the pain if at all?

How are these factors impacting pain care?

MEDICAL:

Probe: Multiple comorbidities

Probe: Nonadherence to medical care; seeking pain care from multiple providers

Probe: Lack of education about care

**Theme 2: Usual care Pain treatment at** [clinic name]

What are the most common chronic pain diagnoses in your clinic?

How do you address chronic pain in the older adult population at [clinic name]?

Probe: medications

Probe: Xrays, MRIs

Probe: referrals to PT

Probe: referrals to a chronic pain clinic

Probe: referrals to chiropractic clinic

Probe: referrals for psychiatry/psychosocial care

Probe: exercise/walking?

Probe: injections

Probe: Other

To what degree do patients follow up with these services? What contributes to this?

Are these services helpful, which ones? Do you notice a difference when patients follow up?

What are patients’ expectations for treatment?

What are their preferences for how pain should be managed?

Is the pain care for older adults with chronic pain coordinated? How?

What are some challenges that you notice about chronic pain care for older adults?

What do you think could improve chronic pain care for older adults?

What services do you think these patients need to do well?

**Domain 2: Program content, implementation and preferences**

**Theme 1: Overview of core program components**

We developed a mind-body activity program called GetActive to support adults with chronic pain. The program is delivered in a group format. It has 10 sessions. Each session is 60 minutes. The program teaches mind body skills like mindfulness, relaxation, self-compassion and gratitude to help patients with chronic pain engage in activities of daily living and increase how much they walk every day. If patients learn and use these skills we can expect them to have less pain, be more engaged with their lives, and have better overall quality of life.

First, what are your initial impressions of a program like this?

Probe: Needed for patients?

Probe: Too complex?

Probe: Not appropriate and why?

What do you think about number of sessions?

**Theme 2: Feedback on format and delivery modality**

What are your thoughts on patients coming in person to the [clinic name] once a week for 10 weeks?

Probe: Transportation – cost/parking What level of payment is needed to offset transportation costs? [required probe]

Probe: COVID19 concerns

Probe: Caretaker of kids

Probe: Multimorbidity getting in the way

Would it be more feasible to conduct the sessions remotely (over Zoom), or a mixture of in-person and over Zoom?

Probes: Technology access and literacy, travel time, cost, privacy, COVID19, level of engagement

**Theme 3: Overview of manual format**

The program we have developed has a written patient manual to follow during program sessions. We want to ensure that this type of document is easy to navigate and understand.

What considerations does the clinic take into account when writing pamphlets, medication instructions, etc for patients?

What reading level are these patient-facing documents?

How many languages are these documents available in?

How do you think older adults are able to engage with these written materials?

**Feedback on core skills**

The program teaches 4 core groups of skills:

1. **Walking and quota based pacing skills:**

Older adults with chronic pain tend to be inactive. Walking is largely safe and helps improve pain and mood. In this program, we ask our patients to gradually increase how much they walk every week. We tell them to link walking with activities that they enjoy or have to do (walk instead of drive to store, walk grandkids to the park). The program is 10 weeks long, and visits are 90 minutes.

What do you think about this skill for your patients?

Are there safe places to walk for the older adults in the winter?

How might we be able to engage patients in walking?

Probe: involve a caregiver, kids.

What might get in the way of them walking?

Many times people with chronic pain do too much when they have less pain, and too little when they have a lot of pain. This skill helps people increase walking regardless of whether or not they have pain.

What do you think about this skill for your patients?

How might we be able to get buy in from patients?

1. **Mind-Body skills**

We teach participants about the mind-body connection and how it can be used to manage pain. We teach include deep breathing and body scan to help patients relax; we teach mindfulness to help patients gain space when they get wrapped up in their pain experience (for example, to observe their pain sensations and how they come and go without trying to change them); we teach self-compassion so that they can be kind when they do not meet they goals.

What do you think about these skills for your patients?

How familiar are they with these skills?

How might we be able to get buy in from patients?

1. **Pain-specific Cognitive-behavioral skills**

We teach cognitive and behavioral skills such as identifying and challenging negative pain-related thoughts, reducing the tendency to catastrophize pain, reducing avoidance, and learning to engage in activities that patients value.

What do you think about these skills for your patients? What do you think about their ability to engage in these cognitive reframing activities?

1. **Identify opportunities and skills to move from the disability to the upward spiral.**

We teach patients how chronic pain leads to low mood and disability, and how to identify where there are opportunities to use program skills to move onto the upward spiral by countering avoidance and engaging in activity. We also teach them myths about pain that hold them onto the disability spiral.

What do you think about this??

**Theme 4. Feedback on delivery as part of billable group visits?**

We would like to implement this program into the group visits led by nurse practitioners at [clinic name]. In this way, the program would be able to live in [clinic name]. Normally this program would be delivered by psychologists. However, this is not feasible.

What do you think about this?

Probe: Pros

Probe Cons

Can you tell us how the billable group visits work at [clinic name]?

Probe: Format (length, drop in versus universal)

Probe: Referrals:

Probe: Content

Probe: length

How is attendance to visits?

Probe: reminder calls

Probe: PCP encouragement

Probe: What are factors that keep patients coming back?

Probe: What are factors that keep patients away?

Probe: What are things that the clinic does to engage patients in group visits?

**Theme 5. Feedback on NPs delivery**

For the programs you have available, how do nurse practitioners got trained to deliver the program?

Probe: training sessions

Probe: manual

Is there a manual that is being used?

How close to the manual do the group visits stay?

What do NPs like about delivering these programs?

What do NPs dislike about delivering these programs?

How do you think NPs would feel about delivering the mind-body activity program we described?

Probe: Content comfort and familiarity with program components as described?

Probe: Comfort with the older adult chronic pain population?

Probe: Format/lengths.

*For NPs, what would help you to feel confident delivering this intervention?*

*Probe: Amount of oversight during delivery?*

*Probe: Any institutional barriers to delivery?*

*Probe: How much time would you be able to put into learning how to deliver the program?*

What can we do to make it easier for NPs to learn to deliver the program?

Probe: fewer sessions

Probe: simple language

Probe: videos

Probe: role plays/Co-Lead with psychologist.

**Domain 3: Barriers and facilitators for program implementation**

**Theme 1: Barriers and facilitators to patient participation**

Referrals:

How can we help you to make referrals to the program?

What is the most efficient and least disruptive way to enroll patients?

Screening:

What barriers can you think that we might encounter to screening patients for study enrollment?

What additional barriers to recruitment should we be aware of? How might we overcome these barriers? What might facilitate recruitment?

Probe: Time constraints

Probe: Compatibility with patients’ needs/need to prioritize other services

Probe: Lack of patient interest

What barriers do you envision to successful implementation of the program through the group format? What might facilitate group participation and engagement?

Probe: Patient engagement

Do you see any barriers to nurse practitioners delivering the intervention? How might we overcome these barriers?

Probe: Comfort with psychosocial intervention

Probe: Time constraints/work level expectations

Probe: Need for training

In your experience, what challenges may arise from having patients speak multiple languages? How can we best overcome these challenges?

How feasible would it be to deliver the intervention using interpreters to accommodate the multiple languages spoken in the clinic within a single intervention group?

Probe: Preference for prioritizing single language groups

Probe: What are your previous experiences with use of interpretive services? Have you ever used them in groups?

Probe: How do you make groups as inclusive as possible while minimizing distractions/disruptions?

Probe: Would this be more feasible in-person or on Zoom?

Probe: Would this require additional funds/supplement?

We are planning to have participants wear actigraphs for 1 week to monitor activity. These are devices worn with a belt over the hip and track activity and step-count. Are there any feasibility concerns regarding the use of actigraphs or the monitoring of patient data generally?

Probe: Patient discomfort with device

Probe: Patient concerns about privacy

**Can you think of any specific strategies that would make it easier to implement the study (e.g., recruitment, screening) in a way that does not disturb the clinic?**

Probe: RA screens the clinic and reminds you when potential participants are on your schedule; you do a brief warm hand-off?

Probe: RA in clinic to work with you?

Probe: What logistical resources are needed?

*It is of particular importance to us that the sample of patients we recruit reflects the diversity of the clinic in which we are conducting this study, specifically with respect to racial and ethnic diversity.* Can you think of any strategies we can use to facilitate this goal?

For interpreters:

What are the barriers to successful use of interpretation services when implementing this study? What can we do to overcome these barriers?

Probe: Screening

Probe: Recruitment/enrollment

Probe: Retention, e.g., with regard to how often interpretative services are available

Probe: Is the manual language able to be translated?

Probe: Conducting groups in a different language (especially with regard to timing)

**WRAP-UP**

Is there anything else that we did not ask that you would like to share? Would you be willing to receive a copy of the manual and either meet again or send us written feedback on the manual?

Thank you for your participation in this focus group today! The information you shared with us is very helpful, and will aid the program in meeting the needs of all patients.
